# Supplementary material for: Role of small private drug shops in malaria and tuberculosis programs in Myanmar: a cross-sectional study
Source: PubMed Central journal article supplement (PMC8594090; doi:10.1186/s40545-021-00335-6), 2021-11-16
Supplement: 40545_2021_335_MOESM2_ESM.pdf [file 40545_2021_335_MOESM2_ESM.pdf]

## Quantitative Survey Questionnaire

### General Questions

| No.  | Question                                                  | Options                                                                                                                                                                                                        |
|------|-----------------------------------------------------------|----------------------------------------------------------------------------------------------------------------------------------------------------------------------------------------------------------------|
| Q001 | How old are you?                                          | __ __  years                                                                                                                                                                                                   |
| Q002 | What is your gender?                                      | 1 – Male<br>2 – Female                                                                                                                                                                                         |
| Q003 | What is the highest level of education you have attained? | 1 – High School<br>2 – Some college<br>3 – Bachelor’s Degree<br>4 – Master’s Degree<br>5 – Doctoral/advanced degree<br>96 - Other (monastery education, lower than high school level, and vocational training) |
| Q004 | How long have you worked with PSI’s malaria/ TB program?  | __ __  years  __ __  months                                                                                                                                                                                    |

### Malaria Related Questions

|      |                                                                                         |                                                                              |
|------|-----------------------------------------------------------------------------------------|------------------------------------------------------------------------------|
| Q101 | What symptoms do you use to define a suspected case? Select all that apply.             | 1 – Fever                                                                    |
|      |                                                                                         | 2 – Chills                                                                   |
|      |                                                                                         | 3 – Headache                                                                 |
|      |                                                                                         | 4 – Vomiting                                                                 |
|      |                                                                                         | 5 – Diarrhea                                                                 |
|      |                                                                                         | 6 – Travel History                                                           |
|      |                                                                                         | 96 – Other (Specify) -----                                                   |
|      |                                                                                         | 98 – Does not know/refused                                                   |
| Q102 | Why do you test suspected cases? Select all that apply.                                 | 1 – To follow national guidelines                                            |
|      |                                                                                         | 2 – Because a patient asks for it                                            |
|      |                                                                                         | 3 – Financial gain                                                           |
|      |                                                                                         | 4 – Because I don’t want to miss a malaria case                              |
|      |                                                                                         | 5 – Because I want to rule out malaria to better identify the actual problem |
|      |                                                                                         | 6 – Because I want to support malaria elimination efforts                    |
|      |                                                                                         | 7 – Because PSI supports me to test                                          |
|      |                                                                                         | 98 – Does not know/refused                                                   |
| Q103 | If a test is negative, would anything prompt you to give an ACT? Select all that apply. | 1 – No, I would never give an ACT for a negative test                        |
|      |                                                                                         | 2 – When they have signs of malaria                                          |
|      |                                                                                         | 3 – When they ask for malaria treatment                                      |
|      |                                                                                         | 4 – children                                                                 |
|      |                                                                                         | 5 – Pregnant women                                                           |
|      |                                                                                         | 6 – Forest goers                                                             |
|      |                                                                                         | 7 – Other high risk groups                                                   |
|      |                                                                                         | 8 – When I don’t trust the test                                              |
|      |                                                                                         | 9 – When I know the patient                                                  |

|      |                                                                                                                                                          |                                                                                                                                                                               |
|------|----------------------------------------------------------------------------------------------------------------------------------------------------------|-------------------------------------------------------------------------------------------------------------------------------------------------------------------------------|
|      |                                                                                                                                                          | 10 – Because I can make money on the ACT                                                                                                                                      |
|      |                                                                                                                                                          | 11 – Worried that I may miss malaria and the patient will become worse                                                                                                        |
|      |                                                                                                                                                          | 12 – If the patient took an antimalarial at home before being tested                                                                                                          |
|      |                                                                                                                                                          | 13 – Used to have malaria recently (last month and not feeling better)                                                                                                        |
|      |                                                                                                                                                          | 98 – Does not know/refused                                                                                                                                                    |
| Q104 | If someone came to see you with a fever/other malaria symptoms and had been in a forested area, is there any reason that you would not give them an RDT? | 1 – Yes                                                                                                                                                                       |
|      |                                                                                                                                                          | 0 – No                                                                                                                                                                        |
|      |                                                                                                                                                          | 98 – Does not know/refused                                                                                                                                                    |
| Q105 | If yes, why would you not test them?                                                                                                                     | 1 – no time                                                                                                                                                                   |
|      |                                                                                                                                                          | 2 – It's unlikely they have malaria                                                                                                                                           |
|      |                                                                                                                                                          | 3 – They refuse                                                                                                                                                               |
|      |                                                                                                                                                          | 4 – I have no incentive to test                                                                                                                                               |
|      |                                                                                                                                                          | 5 – No RDTs in stock                                                                                                                                                          |
|      |                                                                                                                                                          | 96 – Other (Specify) -----                                                                                                                                                    |
|      |                                                                                                                                                          | 98 – Does not know/refused                                                                                                                                                    |
| Q106 | If a test is <i>Plasmodium falciparum</i> (Pf) positive, is there any reason you would not give an ACT if it was in stock?                               | 1 - Lack of confidence in how to prescribe                                                                                                                                    |
|      |                                                                                                                                                          | 2 – Too complicated to explain                                                                                                                                                |
|      |                                                                                                                                                          | 3 – Prefer to refer                                                                                                                                                           |
|      |                                                                                                                                                          | 4 - “Treatment” of malaria is not my duty/job                                                                                                                                 |
|      |                                                                                                                                                          | 5 – ACT does not make margin so much comparing to spending time for counseling                                                                                                |
|      |                                                                                                                                                          | 6 – A chance of the patient might come back in case of complications after taking ACT; I do not want to deal with any issue that might happen after I give the ACT to patient |
|      |                                                                                                                                                          | 7 – No – I would always give an ACT if the test is positive and I have it in stock                                                                                            |
|      |                                                                                                                                                          | 98 – Does not know/refused                                                                                                                                                    |
| Q107 | If an RDT gives a negative result, but the client shows symptoms of malaria, would you provide an antimalarial?                                          | 1 – Yes                                                                                                                                                                       |
|      |                                                                                                                                                          | 2 – No                                                                                                                                                                        |
|      |                                                                                                                                                          | 98 – Does not know/refused                                                                                                                                                    |
| Q108 | If no: If a test is negative, what would you give?                                                                                                       | 1 – Nothing                                                                                                                                                                   |
|      |                                                                                                                                                          | 2 – An antibiotic                                                                                                                                                             |
|      |                                                                                                                                                          | 3 – A fever-reducing medication                                                                                                                                               |
|      |                                                                                                                                                          | 4 - oAMT                                                                                                                                                                      |
|      |                                                                                                                                                          | 98 – Does not know/refused                                                                                                                                                    |
| Q109 | If a client demanded an anti-malarial without first receiving an RDT, what would you do?                                                                 | 1 – Insist on giving an RDT                                                                                                                                                   |
|      |                                                                                                                                                          | 2 – Explain why I cannot give an anti-malarial                                                                                                                                |

|      |                                                       |                                                                                                                                                                                                                                               |
|------|-------------------------------------------------------|-----------------------------------------------------------------------------------------------------------------------------------------------------------------------------------------------------------------------------------------------|
|      |                                                       | <p>3 – Give/sell the anti-malarial requested</p> <p>4 – Offer another type of non-antimalarial drug</p> <p>98 – Does not know/refused</p>                                                                                                     |
| Q110 | What are your main concerns about adherence?          | <p>1 – Patients stop taking drugs once they feel better</p> <p>2 – Patients like to save drugs for another time</p> <p>3 – Patients think they know better</p> <p>4 – Patients forget to take the drugs</p> <p>98 – Does not know/refused</p> |
| Q111 | How much do you trust RDTs?                           | <p>1 – Trust completely</p> <p>2 – Trust somewhat</p> <p>3 – Neutral</p> <p>4 – Distrust somewhat</p> <p>5 – Distrust completely</p> <p>98 – Does not know/refused</p>                                                                        |
| Q112 | How prevalent is treatment on clinic judgment vs. RDT | <p>1 – Very prevalent</p> <p>2 – Somewhat prevalent</p> <p>3 – Neutral</p> <p>4 – Somewhat not prevalent</p> <p>5 – Not at all prevalent</p> <p>98 – Does not know/refused</p>                                                                |
| Q113 | How prevalent is patient demand for different ACT?    | <p>1 – Very prevalent</p> <p>2 – Somewhat prevalent</p> <p>3 – Neutral</p> <p>4 – Somewhat not prevalent</p> <p>5 – Not at all prevalent</p> <p>98 – Does not know/refused</p>                                                                |

## Tuberculosis Related Questions

|      |                                                                                                                          |                                               |
|------|--------------------------------------------------------------------------------------------------------------------------|-----------------------------------------------|
| Q201 | What criteria do you use to define a suspected TB case?<br>Select all that apply.                                        | 1 – Fever                                     |
|      |                                                                                                                          | 2 – Cough more than 1 week                    |
|      |                                                                                                                          | 3 – Cough more than 2 weeks                   |
|      |                                                                                                                          | 4 – Cough with blood                          |
|      |                                                                                                                          | 5 – Weight loss                               |
|      |                                                                                                                          | 6 – Chest pain                                |
|      |                                                                                                                          | 7 – History of TB contact                     |
| Q202 | What is your first response when you meet a suspected TB case?<br>Select only one answer.                                | 1 – Give/sell medicine                        |
|      |                                                                                                                          | 2 – Explain about TB                          |
|      |                                                                                                                          | 3 – Give pamphlets                            |
|      |                                                                                                                          | 4 – Refer to TB diagnosis center              |
|      |                                                                                                                          | 5 – Refer to private clinic                   |
|      |                                                                                                                          | 6 – Refer/contact to PSI staff                |
|      |                                                                                                                          | 7 – Nothing do special                        |
|      |                                                                                                                          | 96 – Other (Specify) -----                    |
| Q203 | If refer, how much do you trust patients would go to the public TB diagnostic centers?                                   | 1 – Trust completely                          |
|      |                                                                                                                          | 2 – Trust somewhat                            |
|      |                                                                                                                          | 3 – Neutral                                   |
|      |                                                                                                                          | 4 – Distrust somewhat                         |
|      |                                                                                                                          | 5 – Distrust completely                       |
|      |                                                                                                                          | 98 – Does not know/refused                    |
| Q204 | If not refer, why would you not refer them?<br>Select all that apply.                                                    | 1 – no time                                   |
|      |                                                                                                                          | 2 – It's unlikely they have TB                |
|      |                                                                                                                          | 3 – Patients refuse                           |
|      |                                                                                                                          | 4 – I have no interest to refer               |
|      |                                                                                                                          | 5 – Cannot contact PSI staff                  |
|      |                                                                                                                          | 6 – Don't know about the referral activity    |
|      |                                                                                                                          | 96 – Other (Specify) -----                    |
|      |                                                                                                                          | 98 – Does not know/refused                    |
| Q205 | If a suspected TB client demanded any medicine without first receiving referral to TB centers, what would you do?        | 1 – Insist on referral to TB centers          |
|      |                                                                                                                          | 2 – Explain why I cannot give any medicine    |
|      |                                                                                                                          | 3 – Give/sell the medicine requested          |
|      |                                                                                                                          | 96 – Other (Specify) -----                    |
|      |                                                                                                                          | 98 – Does not know/refused                    |
| Q206 | What are the barriers you most often confront in participating in TB case referral activities?<br>Select all that apply. | 1 – Concern about TB transmission             |
|      |                                                                                                                          | 2 – Patients refuse                           |
|      |                                                                                                                          | 3 – No Time for explaining about TB           |
|      |                                                                                                                          | 4 – No staff for explaining about TB          |
|      |                                                                                                                          | 5 – Don't know about the referral activity    |
|      |                                                                                                                          | 6 – Difficulties in filling the referral form |
|      |                                                                                                                          | 7 – Lack of support from health staff         |
|      |                                                                                                                          | 8 – Lack of support from PSI/PSI staff        |
|      |                                                                                                                          | 96 – Other (Specify) -----                    |

|      |                                                                                                               |                                                                          |
|------|---------------------------------------------------------------------------------------------------------------|--------------------------------------------------------------------------|
| Q207 | What are the motivating factors to participate in TB case referral activities?<br>Select all that apply.      | 1 – PSI program support                                                  |
|      |                                                                                                               | 2 – Support from public health staff                                     |
|      |                                                                                                               | 3 – Community spirit                                                     |
|      |                                                                                                               | 4 – Religious belief                                                     |
|      |                                                                                                               | 5 – Appreciation and recognition from community, health staff and/or PSI |
|      |                                                                                                               | 96 – Other (Specify) -----                                               |
| Q208 | What are the benefits you received by participating in TB case referral activities?<br>Select all that apply. | 1 – Monetary Incentives from the program                                 |
|      |                                                                                                               | 2 – Non-monetary Incentives from the program                             |
|      |                                                                                                               | 3 – Benefit to your business                                             |
|      |                                                                                                               | 4 – Self-satisfaction                                                    |
|      |                                                                                                               | 5 – Appreciation and recognition from community, health staff and/or PSI |
|      |                                                                                                               | 96 – Other (Specify) -----                                               |
| Q209 | How much do you trust TB diagnosis in the public TB diagnostic centers?                                       | 1 – Trust completely                                                     |
|      |                                                                                                               | 2 – Trust somewhat                                                       |
|      |                                                                                                               | 3 – Neutral                                                              |
|      |                                                                                                               | 4 – Distrust somewhat                                                    |
|      |                                                                                                               | 5 – Distrust completely                                                  |
|      |                                                                                                               | 98 – Does not know/refused                                               |
| Q210 | What are your main concerns about adherence to TB treatment?                                                  | 1 – Patients stop taking drugs once they feel better                     |
|      |                                                                                                               | 2 – Patients stop taking drugs as they are scared of side effects        |
|      |                                                                                                               | 3 – Patients think they know better                                      |
|      |                                                                                                               | 4 – Patients forget to take the drugs                                    |
|      |                                                                                                               | 98 – Does not know/refused                                               |
